# Supplementary material for: Tolerance and Safety of an Anti-Regurgitation Formula Containing Locust Bean Gum, Pre-, and Postbiotics: A Multi-Country Multi-Center Prospective Randomized Controlled Study in Infants with Regurgitation
Source: MDPI journal article supplement (doi:10.3390/nu16060899), 2024-03-20
Supplement: s1 [file s1]

## Supplementary Materials

**Table S1: Main nutritional components of study products**

| Parameter                                                                                      | Test formula <sup>1</sup> | Control formula <sup>2</sup> |
|------------------------------------------------------------------------------------------------|---------------------------|------------------------------|
|                                                                                                | Prepared per 100 mL       | Prepared per 100 mL          |
| Energy (kcal)                                                                                  | 66                        | 66                           |
| Protein (g)                                                                                    | 1.3                       | 1.3                          |
| Carbohydrates (g)                                                                              | 7.3                       | 7.4                          |
| Fats (g), of which:                                                                            | 3.4                       | 3.4                          |
| saturated fatty acids                                                                          | 1.5                       | 1.5                          |
| <b>Non-digestible carbohydrates / fiber (g)</b>                                                |                           |                              |
| scGOS #                                                                                        | 0.36 (fiber: 0.24)        | 0.72 (fiber: 0.48)           |
| lcFOS                                                                                          | 0.04                      | 0.08                         |
| LBG                                                                                            | 0.4                       | -                            |
| <b>Partly fermented formula with postbiotics</b> derived from Lactofidus™ fermentation process | 26%                       | 26%                          |

# 67% of scGOS in EC declaration can be considered fiber

<sup>1</sup>Contents of minerals and vitamins are based on EU regulation for Food for Special Medical Purposes (2016/128/EC)

<sup>2</sup>Contents of minerals and vitamins are based on EU regulation 2016/127/EC.

**Table S2: Demographic and baseline characteristics of infants per study group in the All-Subjects-Randomised population**

|                                                                            | Test group<br>n=51 | Control group<br>n=52 |
|----------------------------------------------------------------------------|--------------------|-----------------------|
| Infant sex, % male/female                                                  | 37.3/62.7          | 50.0/50.0             |
| Race, n (% of subjects)                                                    |                    |                       |
| White                                                                      | 50 (100.0%)        | 49 (98.0%)            |
| Other                                                                      | 0 (0.0%)           | 1 (2.0%)              |
| Missing                                                                    | 1                  | 2                     |
| Gestational age (days), median (Q1-Q3)                                     | 277 (272; 280)     | 273 (271; 280)        |
| Age at inclusion (days), mean (SD)                                         | 37.3 (13.0)        | 36.4 (12.8)           |
| Country (% Poland/Ukraine/Italy)                                           | 58.8/31.4/9.8      | 63.5/26.9/9.6         |
| Birth weight (g), median (Q1-Q3)                                           | 3480 (3100; 3750)  | 3300 (3115; 3645)     |
| Birth length (cm), median (Q1-Q3)                                          | 54 (51; 56)        | 53 (51; 56)           |
| Maternal age (years; mean $\pm$ SD)                                        | 29.7 (6.3)         | 28.5 (5.0)            |
| Mode of delivery, % vaginal/c-section                                      | 51.0/49.0          | 50.0/50.0             |
| Duration of regurgitation prior to inclusion (days), mean (SD)             | 26.0 (12.0)        | 25.2 (10.7)           |
| Duration of exclusive formula feeding prior to inclusion (days), mean (SD) | 29.1 (15.0)        | 26.1 (14.2)           |
| Type of formula used prior to inclusion, n (% of subjects)                 |                    |                       |
| Formula containing <0.5 g/100 ml prebiotics                                | 33 (64.7%)         | 20 (38.5%)            |
| Formula containing 0.5-0.8 g/100 ml prebiotics                             | 27 (52.9%)         | 37 (71.2%)            |

Table S3 : Infant Gastrointestinal Symptom Questionnaire (IGSQ) item scores in the Per-Protocol population

| Parameter                                                                                                                     | Test group<br>n=48 |           |                 | Control group<br>n=52 |           |                 | p-value <sup>1</sup> |
|-------------------------------------------------------------------------------------------------------------------------------|--------------------|-----------|-----------------|-----------------------|-----------|-----------------|----------------------|
|                                                                                                                               | n                  | Mean ± SD | Median (Q1; Q3) | n                     | Mean ± SD | Median (Q1; Q3) |                      |
| <b>IGSQ item 1:</b> Thinking about the past week, how many times did your baby pass a hard stool?                             |                    |           |                 |                       |           |                 |                      |
| Baseline (Visit 1)                                                                                                            | 48                 | 2.0 (1.2) | 1 (1; 3)        | 52                    | 1.8 (1.2) | 1 (1; 2)        | 0.312                |
| Week 2 (Visit 2)                                                                                                              | 44                 | 2.0 (1.1) | 1 (1; 3)        | 51                    | 1.4 (0.9) | 1 (1; 1)        | 0.008                |
| Week 4 (Visit 3)                                                                                                              | 44                 | 1.7 (1.0) | 1 (1; 2)        | 51                    | 1.4 (0.7) | 1 (1; 1)        | 0.072                |
| Week 8 (Visit 4)                                                                                                              | 43                 | 1.4 (0.7) | 1 (1; 2)        | 50                    | 1.2 (0.5) | 1 (1; 1)        | 0.237                |
| Age of 17 weeks (Visit 5)                                                                                                     | 37                 | 1.2 (0.5) | 1 (1; 1)        | 42                    | 1.2 (0.4) | 1 (1; 1)        | 0.741                |
| <b>IGSQ item 2:</b> Thinking about the past week, how many times did your baby have difficulty when passing a bowel movement? |                    |           |                 |                       |           |                 |                      |
| Baseline (Visit 1)                                                                                                            | 48                 | 2.4 (1.3) | 3 (1; 3)        | 52                    | 2.6 (1.3) | 3 (1; 4)        | 0.275                |
| Week 2 (Visit 2)                                                                                                              | 44                 | 2.2 (1.1) | 2 (1; 3)        | 51                    | 1.8 (0.9) | 2 (1; 3)        | 0.161                |
| Week 4 (Visit 3)                                                                                                              | 44                 | 1.9 (1.1) | 2 (1; 3)        | 51                    | 1.6 (1.0) | 1 (1; 2)        | 0.167                |
| Week 8 (Visit 4)                                                                                                              | 43                 | 1.6 (0.9) | 1 (1; 2)        | 50                    | 1.3 (0.6) | 1 (1; 1)        | 0.121                |
| Age of 17 weeks (Visit 5)                                                                                                     | 37                 | 1.3 (0.5) | 1 (1; 2)        | 42                    | 1.2 (0.4) | 1 (1; 1)        | 0.252                |
| <b>IGSQ item 3:</b> Thinking about a usual day in the past week, how many times did milk come out of your baby's mouth?       |                    |           |                 |                       |           |                 |                      |
| Baseline (Visit 1)                                                                                                            | 48                 | 3.9 (0.7) | 4 (3; 4)        | 52                    | 3.6 (0.8) | 4 (3; 4)        | 0.071                |
| Week 2 (Visit 2)                                                                                                              | 44                 | 2.3 (0.8) | 2 (2; 3)        | 51                    | 2.7 (0.8) | 3 (2; 3)        | 0.055                |
| Week 4 (Visit 3)                                                                                                              | 44                 | 1.9 (0.8) | 2 (1; 3)        | 51                    | 2.5 (0.9) | 3 (2; 3)        | 0.001                |
| Week 8 (Visit 4)                                                                                                              | 43                 | 1.5 (0.6) | 1 (1; 2)        | 50                    | 2.2 (1.0) | 2 (1; 3)        | <.001                |
| Age of 17 weeks (Visit 5)                                                                                                     | 37                 | 1.6 (0.9) | 1 (1; 2)        | 42                    | 2.1 (0.8) | 2 (2; 3)        | 0.004                |

|                                                                                                                                                           |    |           |          |    |           |          |       |
|-----------------------------------------------------------------------------------------------------------------------------------------------------------|----|-----------|----------|----|-----------|----------|-------|
| <b>IGSQ item 4:</b> Thinking about the past week, how much milk usually came out each time?                                                               |    |           |          |    |           |          |       |
| Baseline (Visit 1)                                                                                                                                        | 48 | 1.7 (0.7) | 2 (1; 2) | 52 | 1.8 (0.8) | 2 (1; 2) | 0.997 |
| Week 2 (Visit 2)                                                                                                                                          | 44 | 1.3 (0.6) | 1 (1; 2) | 51 | 1.3 (0.6) | 1 (1; 2) | 0.774 |
| Week 4 (Visit 3)                                                                                                                                          | 44 | 1.1 (0.3) | 1 (1; 1) | 51 | 1.2 (0.5) | 1 (1; 1) | 0.180 |
| Week 8 (Visit 4)                                                                                                                                          | 42 | 1.0 (0.2) | 1 (1; 1) | 50 | 1.2 (0.4) | 1 (1; 1) | 0.088 |
| Age of 17 weeks (Visit 5)                                                                                                                                 | 37 | 1.0 (0.2) | 1 (1; 1) | 42 | 1.1 (0.3) | 1 (1; 1) | 0.128 |
| <b>IGSQ item 5:</b> Thinking about the past week, how often did your baby seem uncomfortable or fussy when milk came out of his or her mouth?             |    |           |          |    |           |          |       |
| Baseline (Visit 1)                                                                                                                                        | 48 | 2.5 (1.1) | 3 (1; 3) | 52 | 2.3 (1.2) | 2 (1; 3) | 0.449 |
| Week 2 (Visit 2)                                                                                                                                          | 44 | 1.8 (0.9) | 2 (1; 3) | 51 | 1.8 (1.0) | 1 (1; 3) | 0.901 |
| Week 4 (Visit 3)                                                                                                                                          | 44 | 1.7 (0.9) | 1 (1; 3) | 51 | 1.5 (0.8) | 1 (1; 2) | 0.623 |
| Week 8 (Visit 4)                                                                                                                                          | 43 | 1.3 (0.7) | 1 (1; 1) | 50 | 1.4 (0.8) | 1 (1; 1) | 0.681 |
| Age of 17 weeks (Visit 5)                                                                                                                                 | 37 | 1.1 (0.4) | 1 (1; 1) | 42 | 1.2 (0.4) | 1 (1; 1) | 0.497 |
| <b>IGSQ item 6:</b> Thinking about the past week, how many times did your baby arch his or her back as if in pain when milk came out of his or her mouth? |    |           |          |    |           |          |       |
| Baseline (Visit 1)                                                                                                                                        | 48 | 2.2 (1.4) | 2 (1; 3) | 51 | 2.2 (1.3) | 2 (1; 3) | 0.988 |
| Week 2 (Visit 2)                                                                                                                                          | 44 | 1.5 (0.8) | 1 (1; 2) | 51 | 1.5 (0.9) | 1 (1; 2) | 0.861 |
| Week 4 (Visit 3)                                                                                                                                          | 44 | 1.3 (0.6) | 1 (1; 1) | 51 | 1.4 (0.7) | 1 (1; 2) | 0.148 |
| Week 8 (Visit 4)                                                                                                                                          | 43 | 1.2 (0.5) | 1 (1; 1) | 50 | 1.2 (0.4) | 1 (1; 1) | 0.786 |
| Age of 17 weeks (Visit 5)                                                                                                                                 | 37 | 1.0 (0.2) | 1 (1; 1) | 42 | 1.1 (0.3) | 1 (1; 1) |       |
| <b>IGSQ item 7:</b> Thinking about the past week, how much total time did your baby usually cry in a day?                                                 |    |           |          |    |           |          |       |
| Baseline (Visit 1)                                                                                                                                        | 48 | 2.3 (1.1) | 2 (2; 3) | 52 | 2.3 (1.2) | 2 (2; 3) | 0.726 |
| Week 2 (Visit 2)                                                                                                                                          | 44 | 1.7 (0.8) | 2 (1; 2) | 51 | 1.7 (0.9) | 2 (1; 2) | 0.890 |
| Week 4 (Visit 3)                                                                                                                                          | 44 | 1.5 (0.6) | 1 (1; 2) | 50 | 1.7 (0.8) | 2 (1; 2) | 0.105 |
| Week 8 (Visit 4)                                                                                                                                          | 43 | 1.3 (0.6) | 1 (1; 1) | 50 | 1.5 (0.7) | 1 (1; 2) | 0.154 |
| Age of 17 weeks (Visit 5)                                                                                                                                 | 37 | 1.4 (0.7) | 1 (1; 2) | 42 | 1.3 (0.8) | 1 (1; 1) | 0.364 |

|                                                                                                                                                         |    |           |          |    |           |          |       |
|---------------------------------------------------------------------------------------------------------------------------------------------------------|----|-----------|----------|----|-----------|----------|-------|
| <b>IGSQ item 8:</b> Thinking about the past week, how many times were you unable to soothe your baby to stop his or her crying?                         |    |           |          |    |           |          |       |
| Baseline (Visit 1)                                                                                                                                      | 48 | 2.0 (1.3) | 1 (1; 3) | 52 | 1.8 (1.2) | 1 (1; 2) | 0.451 |
| Week 2 (Visit 2)                                                                                                                                        | 44 | 1.8 (1.0) | 1 (1; 2) | 51 | 1.6 (1.0) | 1 (1; 2) | 0.483 |
| Week 4 (Visit 3)                                                                                                                                        | 44 | 1.4 (0.7) | 1 (1; 2) | 51 | 1.5 (1.0) | 1 (1; 2) | 0.988 |
| Week 8 (Visit 4)                                                                                                                                        | 43 | 1.4 (1.0) | 1 (1; 1) | 50 | 1.4 (0.9) | 1 (1; 1) | 0.996 |
| Age of 17 weeks (Visit 5)                                                                                                                               | 37 | 1.2 (0.8) | 1 (1; 1) | 42 | 1.3 (0.8) | 1 (1; 1) | 0.357 |
| <b>IGSQ item 9:</b> Thinking about the past week, how many times did your baby cry during or right after a feeding because the milk bothered your baby? |    |           |          |    |           |          |       |
| Baseline (Visit 1)                                                                                                                                      | 48 | 2.3 (1.5) | 2 (1; 4) | 52 | 2.1 (1.4) | 1 (1; 3) | 0.674 |
| Week 2 (Visit 2)                                                                                                                                        | 44 | 1.7 (1.1) | 1 (1; 2) | 51 | 1.8 (1.2) | 1 (1; 3) | 0.782 |
| Week 4 (Visit 3)                                                                                                                                        | 44 | 1.6 (0.9) | 1 (1; 2) | 51 | 1.8 (1.1) | 1 (1; 2) | 0.524 |
| Week 8 (Visit 4)                                                                                                                                        | 43 | 1.5 (1.1) | 1 (1; 1) | 50 | 1.2 (0.4) | 1 (1; 1) | 0.254 |
| Age of 17 weeks (Visit 5)                                                                                                                               | 37 | 1.4 (0.9) | 1 (1; 1) | 42 | 1.3 (0.6) | 1 (1; 1) | 0.937 |
| <b>IGSQ item 10:</b> Thinking about the past week, on how many days was your baby fussy?                                                                |    |           |          |    |           |          |       |
| Baseline (Visit 1)                                                                                                                                      | 48 | 2.6 (1.0) | 3 (2; 3) | 52 | 2.8 (1.3) | 3 (1; 4) | 0.525 |
| Week 2 (Visit 2)                                                                                                                                        | 44 | 2.3 (0.9) | 2 (2; 3) | 51 | 2.3 (1.0) | 2 (1; 3) | 1.000 |
| Week 4 (Visit 3)                                                                                                                                        | 44 | 2.0 (1.0) | 2 (1; 3) | 51 | 2.1 (0.9) | 2 (1; 3) | 0.661 |
| Week 8 (Visit 4)                                                                                                                                        | 43 | 1.9 (1.0) | 2 (1; 2) | 50 | 1.7 (1.1) | 1 (1; 2) | 0.283 |
| Age of 17 weeks (Visit 5)                                                                                                                               | 37 | 1.7 (1.0) | 1 (1; 2) | 42 | 1.8 (1.1) | 1 (1; 2) | 0.987 |
| <b>IGSQ item 11:</b> Thinking about the past week, how many times were you unable to soothe your baby when he or she was fussy?                         |    |           |          |    |           |          |       |
| Baseline (Visit 1)                                                                                                                                      | 48 | 1.9 (1.3) | 1 (1; 2) | 52 | 1.9 (1.4) | 1 (1; 3) | 0.804 |
| Week 2 (Visit 2)                                                                                                                                        | 44 | 1.5 (0.8) | 1 (1; 2) | 51 | 1.6 (0.9) | 1 (1; 2) | 0.695 |
| Week 4 (Visit 3)                                                                                                                                        | 44 | 1.4 (0.7) | 1 (1; 2) | 51 | 1.5 (0.9) | 1 (1; 2) | 0.689 |
| Week 8 (Visit 4)                                                                                                                                        | 43 | 1.4 (0.9) | 1 (1; 1) | 50 | 1.4 (0.9) | 1 (1; 1) | 0.719 |
| Age of 17 weeks (Visit 5)                                                                                                                               | 37 | 1.2 (0.7) | 1 (1; 1) | 42 | 1.4 (0.8) | 1 (1; 1) | 0.291 |

| <b>IGSQ item 12:</b> Thinking about the past week, how many times in a usual day was your baby gassy?               |    |           |          |    |           |          |       |
|---------------------------------------------------------------------------------------------------------------------|----|-----------|----------|----|-----------|----------|-------|
| Baseline (Visit 1)                                                                                                  | 48 | 4.0 (0.9) | 4 (3; 5) | 52 | 4.1 (0.9) | 4 (3; 5) | 0.459 |
| Week 2 (Visit 2)                                                                                                    | 44 | 3.7 (1.1) | 4 (3; 5) | 51 | 3.7 (1.3) | 4 (3; 5) | 0.966 |
| Week 4 (Visit 3)                                                                                                    | 44 | 3.5 (1.2) | 3 (3; 5) | 51 | 3.7 (1.4) | 4 (3; 5) | 0.287 |
| Week 8 (Visit 4)                                                                                                    | 43 | 3.3 (1.3) | 3 (2; 5) | 50 | 3.6 (1.4) | 4 (2; 5) | 0.473 |
| Age of 17 weeks (Visit 5)                                                                                           | 37 | 3.1 (1.4) | 3 (2; 4) | 42 | 3.2 (1.5) | 4 (2; 5) | 0.673 |
| <b>IGSQ item 13:</b> Thinking about the past week, how often did gas seem to make your baby uncomfortable or fussy? |    |           |          |    |           |          |       |
| Baseline (Visit 1)                                                                                                  | 48 | 2.4 (1.3) | 3 (1; 4) | 52 | 2.6 (1.2) | 3 (1; 3) | 0.484 |
| Week 2 (Visit 2)                                                                                                    | 44 | 1.9 (1.0) | 2 (1; 3) | 51 | 2.1 (1.1) | 2 (1; 3) | 0.554 |
| Week 4 (Visit 3)                                                                                                    | 44 | 2.0 (1.0) | 2 (1; 3) | 51 | 1.8 (1.0) | 1 (1; 3) | 0.451 |
| Week 8 (Visit 4)                                                                                                    | 43 | 1.7 (0.8) | 1 (1; 2) | 50 | 1.6 (0.8) | 1 (1; 2) | 0.698 |
| Age of 17 weeks (Visit 5)                                                                                           | 37 | 1.3 (0.6) | 1 (1; 1) | 42 | 1.3 (0.6) | 1 (1; 1) | 0.814 |

<sup>1</sup> p-value based on Mann-Whitney U test between test and control group.
